# Supplementary material for: Occurrence of tornado outbreaks influenced by solar wind–magnetosphere–ionosphere–atmosphere coupling
Source: Copernicus journal article supplement (doi:10.5194/asr-22-19-2025), 2025-07-18
Supplement: Supplementary file 1 [file asr-22-19-2025-supplement.pdf]

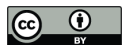

*Supplement of*

## **Occurrence of tornado outbreaks influenced by solar wind–magnetosphere–ionosphere–atmosphere coupling**

**Paul Prikryl and Vojto Rušin**

*Correspondence to:* Paul Prikryl ([paul.prikryl@unb.ca](mailto:paul.prikryl@unb.ca))

The copyright of individual parts of the supplement might differ from the article licence.

## Supplementary material

### Contents of this file

Text

Figures S1, S2, and S3

Table S1

### Tornado outbreaks in the United States in the context of solar wind

In Section 3.2 of the main manuscript, the occurrence of large tornado outbreaks (20 or more tornadoes per day) relative to arrivals of solar wind disturbances is classified into four groups: tornado outbreaks that closely followed co-rotating interaction regions (CIRs; Type A) or interplanetary coronal mass ejections (ICMEs; Type C), closely preceded the heliospheric current sheet HCS/CIR associated with high-density plasma (HDP; Type B), and tornado outbreaks that occurred within the main body of declining major high-speed streams (HSS; Type D). Table S1 lists large tornado outbreaks from 1963 to 2023 along with references to solar wind disturbances and the assigned types.

Figure S1 shows solar wind variables with the symbols on the time axis indicating HSS/CIRs arrivals, impacts of ICMEs, and the interplanetary magnetic field (IMF) sector boundary/HCS crossings. The IMF direction longitude is shown to identify magnetic sector boundaries as well as transient HCS crossings. Where available, the proxy magnetic field sectors (A: away, T: toward) are also indicated on the time axis. Large tornado outbreaks are highlighted in light green color. Outbreaks associated with recurrent HSSs are marked with asterisks.

In 1973 (Figure S1a), the arrivals of a recurrent HSS/CIR on May 6 and June 2, 1973 (one solar rotation apart) were closely followed by large tornado outbreaks (A\*). Type B outbreaks were associated with HCS/HDP on May 28 and June 17, 1973. In 2009 (Figure S1b), the arrivals of a recurrent HSS/CIR on April 9 and May 6 were followed by large tornado outbreaks (A\*). Type B outbreak on April 29/30 was associated with HCS/HDP at the end of April. Furthermore, a moderate outbreak occurred following the arrivals of HSS/CIRs on April 16, and two large outbreaks followed a minor and moderate HSS/CIRs on May 2 and 14, respectively.

Figure S1c shows tornado outbreak cases in May 2010 and January 2012. The arrivals of HSS/CIRs on May 10 and 19 were closely associated with large tornado outbreaks (A). Tornado outbreaks (B) on May 1-2 and 25-26 were associated with HCS/HDP on May 2 and 26, respectively. Two ICMEs on January 22 and 24, 2012, were followed by tornado outbreaks (C) on January 23 and 25, respectively.

In 2018 (Figure S1d), the arrivals of a recurrent HSS/CIR on October 7 and November 4 were followed by large tornado outbreaks as these HSSs started to decline (D\*), while the next arrival of this recurrent HSS/CIR on December 1 was closely followed by a large outbreak (A\*). A moderate outbreak on October 13 coincided with a strong HSS/CIR. Two large outbreaks (B) on October 2/3 and November 1 were associated with HCS/HDP.

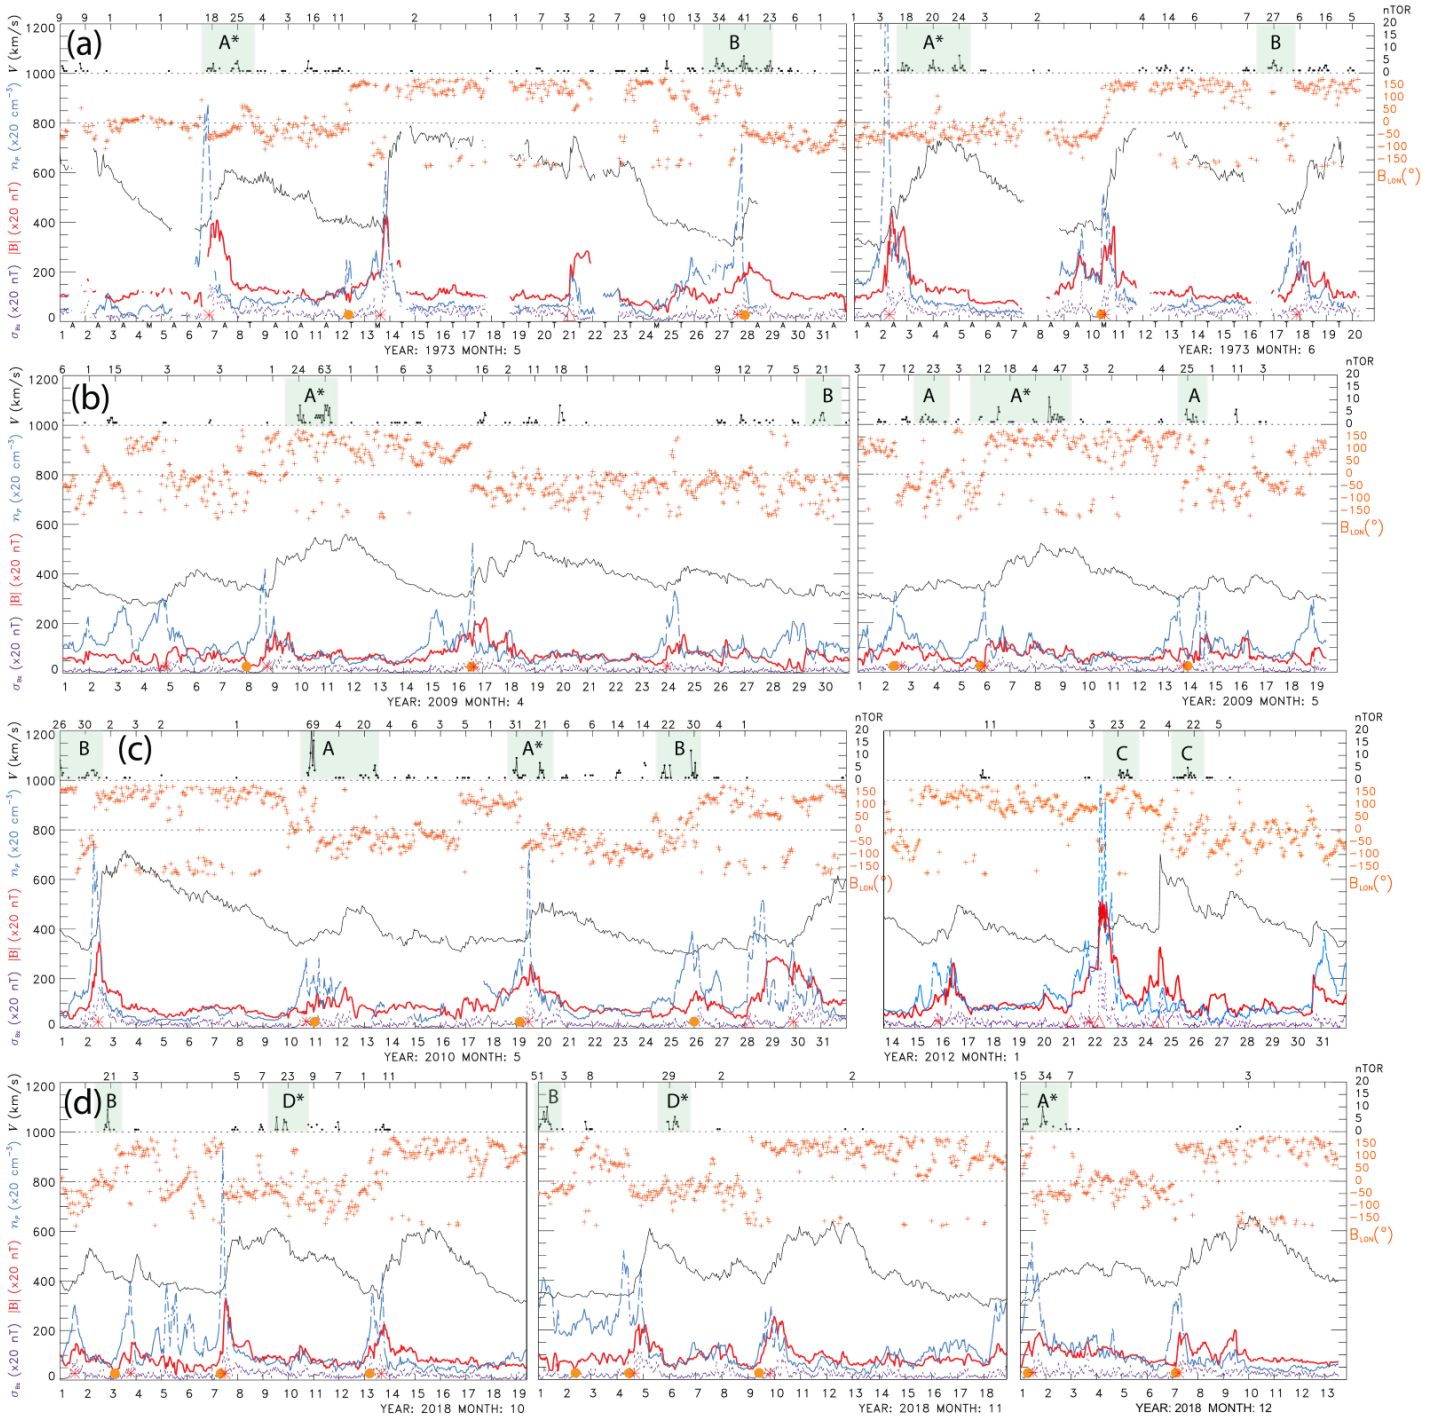

**Figure S1:** The OMNI solar wind  $V$  (solid black line),  $B$  (red),  $n_p$  (broken light blue line),  $\sigma_{Bz}$  (dotted purple line) with the y-axis scale factors shown on the left, and the magnetic field direction longitude (red crosses) with the y-axis shown on the right. The symbols at the time axis indicate (\*) CIRs, ( $\Delta$ ) ICMEs, ( $\bullet$ ) HCS crossings, and where available, the proxy magnetic field sectors (A: away, T: toward). Hourly and daily numbers of tornadoes are shown at the top and days of tornado outbreaks are highlighted and labeled as Type A-D for periods in (a) May-June 1973, (b) April-May 2009, (c) May 2010, January 2012, and (d) October-December 2018. Outbreaks associated with recurrent HSSs are marked with asterisks.

## **Assessment of conditional symmetric instability and slantwise convection**

To evaluate the likelihood of CSI and slantwise convection several indices were calculated for events of November 1-2, November 5-7, and December 1-2, 2018, using the ERA5 reanalysis. These indices include SCAPE, SCAPE residuals (SCAPE – CAPE), and vertically integrated extent of realizable symmetric instability. A high SCAPE, indicating high convective available potential energy for a slantwise ascending air parcel from low levels is found in the frontal zones of the cyclone, with SCAPE residuals shown in red contours (Figure S2a). Figure S2b shows hourly precipitation derived from ERA5 overlaid with the SCAPE residual contours indicating a dominance of slantwise over upright convection. The vertically integrated extent of realizable symmetric instability (VRS) shows the thickness of the air layer (measured in pressure), where CSI, high relative humidity, and vertical motion coexist (Chen et al., 2018). Figure S2c shows that in the frontal zones the high-rate precipitation is co-located with high VRS values of above 100 hPa, a strong indication that CSI is being released actively there with high VRS values matching the high precipitation derived from ERA5 (Figure S2b) that persisted for several hours. Figure S2d shows low-level southerly wind and the wind shear, evaluated between 900 and 1000 hPa levels.

Chen et al. (2022a) identified cyclone tracks with a storm tracking algorithm performed in a region covering North America and part of the Pacific and Atlantic Oceans (20–80°N, 180–0°W) using ERA5 reanalysis data. Storm tracks of the NAEC cyclones #23305, #23311, and #23350 (November 1-2, November 5-7, and December 1-2, 2018) are superposed in Figure S2d. The intensifying cyclones reached the minimum surface low pressure of 997, 986, and 986 hPa, respectively.



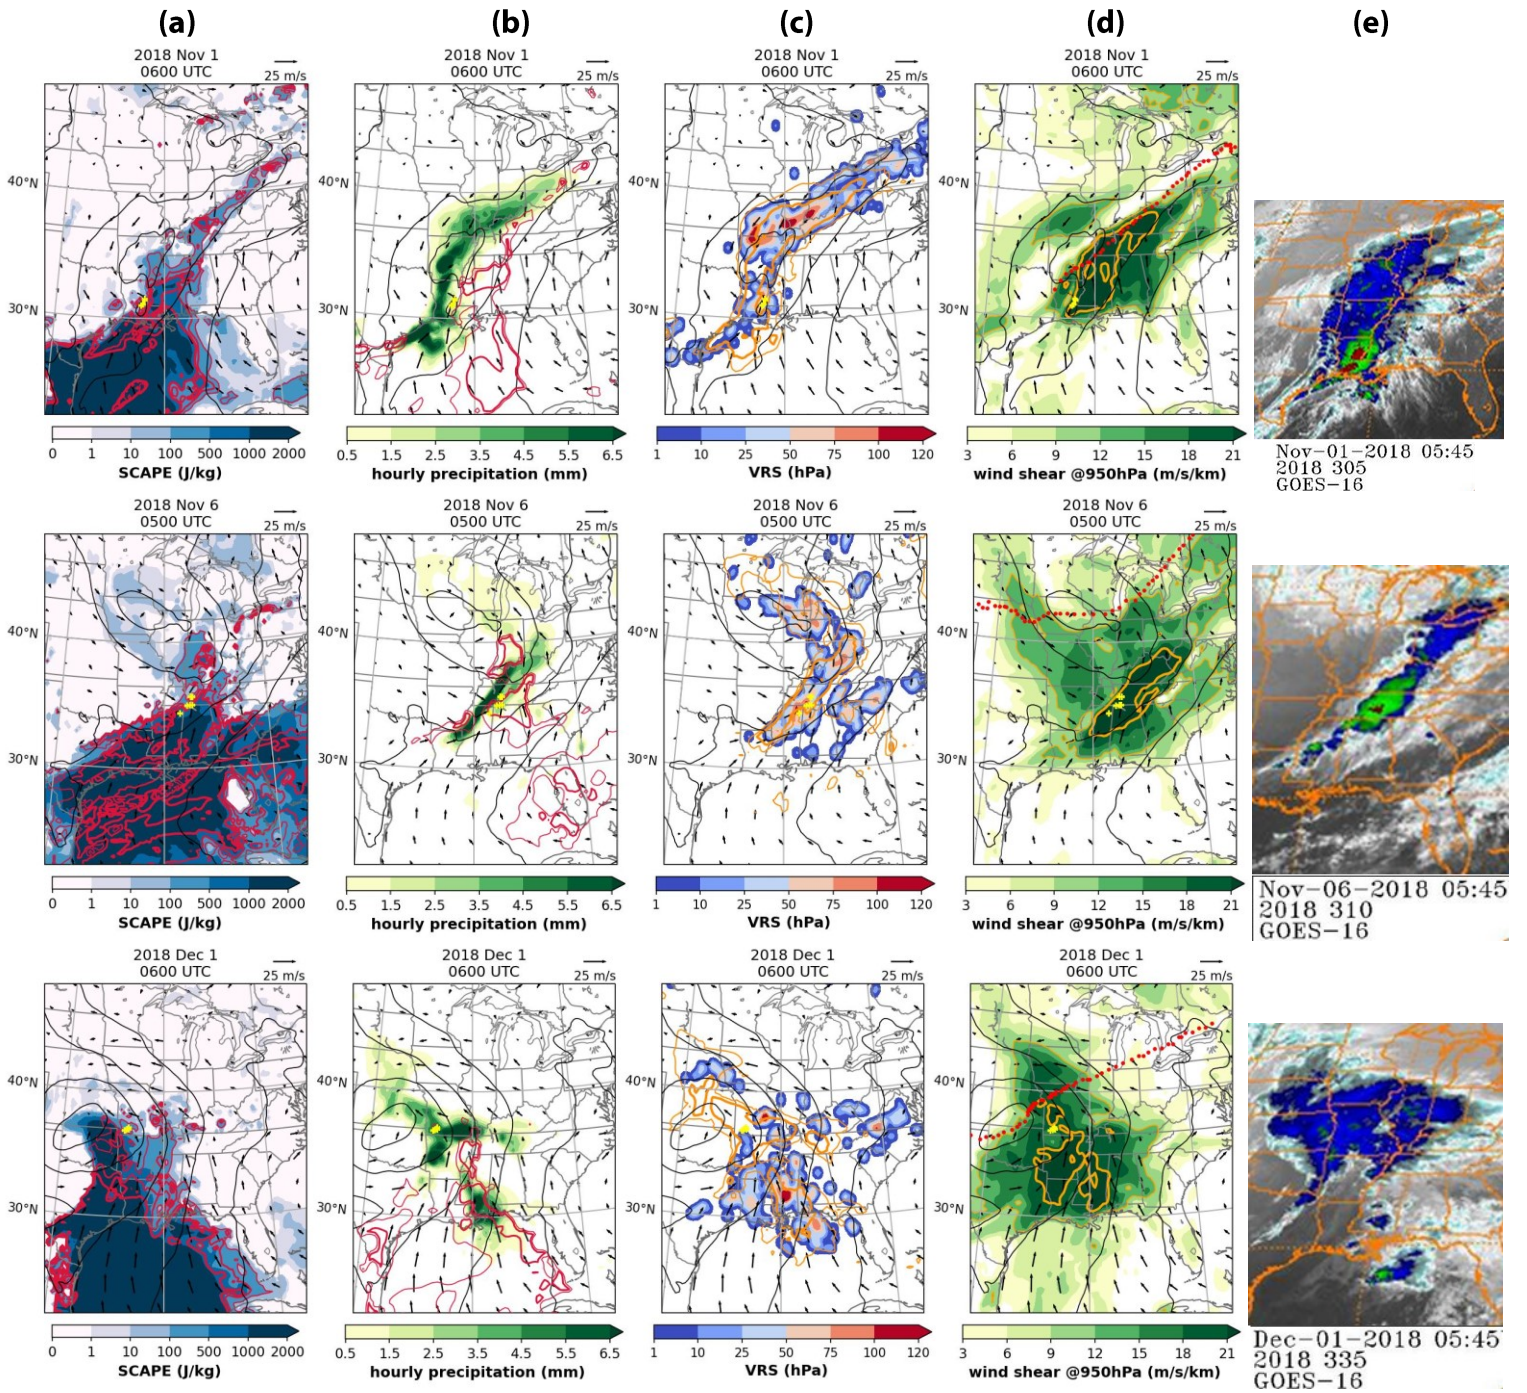

**Figure S2.** (a) SCAPE (shaded), SCAPE-CAPE (red contours; 100, 300, 500 J/kg), (b) 1-h accumulated precipitation (shaded),  $f_s$  (red contours; thin for 0.5, thick for 0.8), (c) VRS (shaded), precipitation (yellow contours; 0.5, 5.5 mm/h), (d) low-level wind shear (yellow contour; 12, 21 m/s/km). The tracks of the NAEC storms #23305, #23311, and #23350 are overlaid (red crosses). (a-d) All overlapped with 950-hPa wind (vectors; m/s), 950-hPa geopotential height (black contours; m; at intervals of 50 m). Tornado locations are shown by yellow crosses. (e) The GOES-16 infrared images of corresponding extratropical cyclones on November 1, 6, and December 1, 2018.

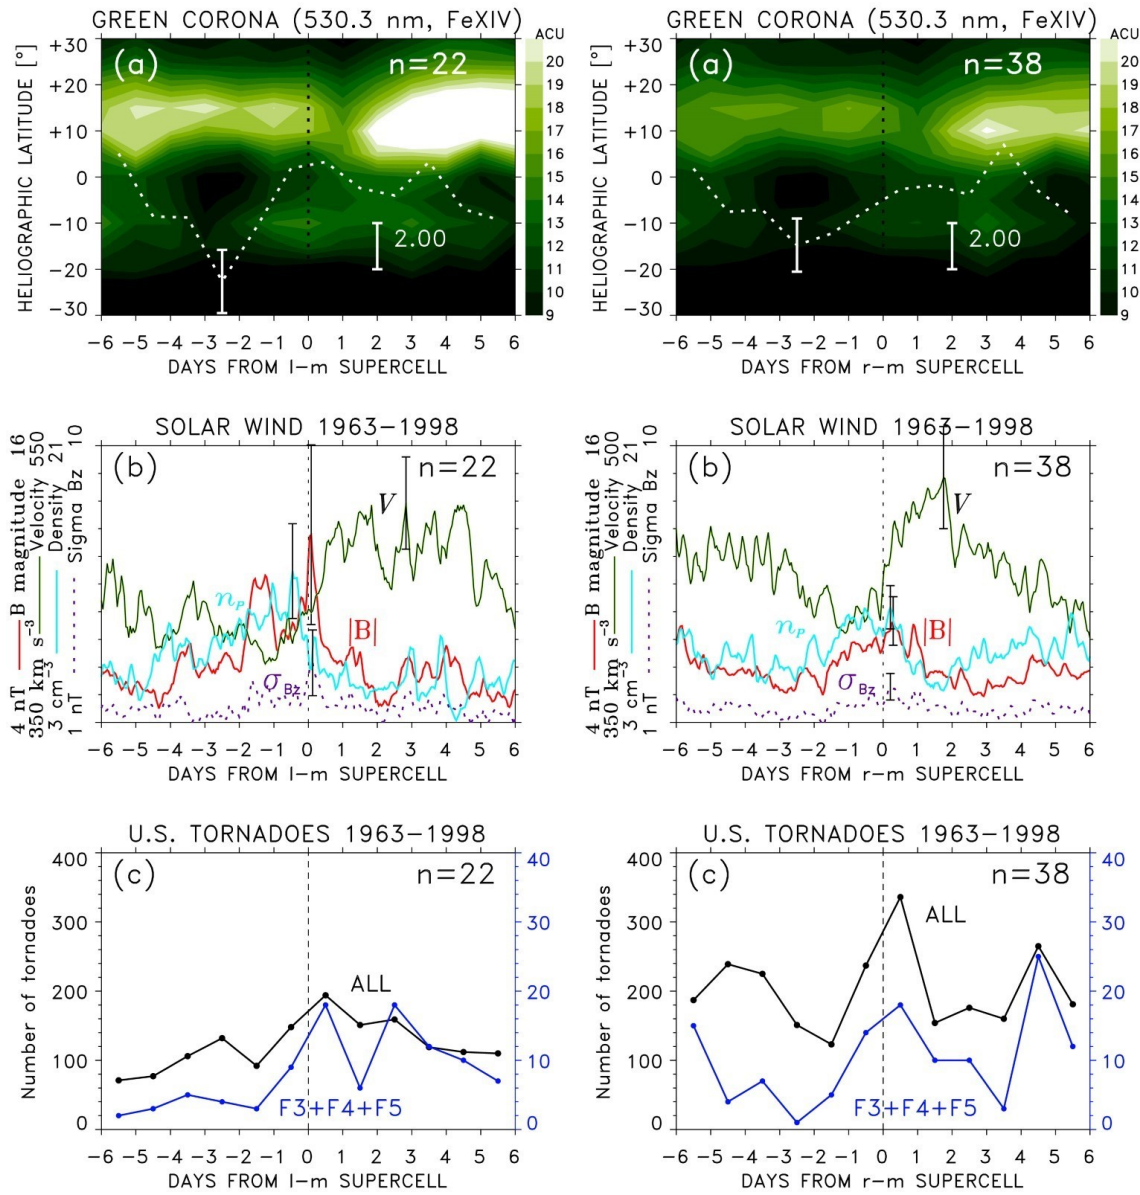

**Figure S3.** SPE analysis of time series of (a) green corona intensity  $I_{GC}$ , (b) solar wind plasma variables, and (c) U.S. tornado counts, separately keyed to times of left- and right-moving supercells. (a) The mean  $I_{GC}$  at heliographic latitude  $-5^\circ$ , with the mean value over the period of 12 days subtracted, is shown by a white dotted line.

Table S1 lists cases of large tornado outbreaks in the years 1963–2023. The columns show the assigned group (Type), the outbreak dates with the 24-hourly tornado counts centered on 0 UT  $\pm$  12 h in parentheses, the principal location, and the key dates of HCS, CIR or ICME, along with notes on the presence of HDP, maximum HSS velocity, or geomagnetic storm index Dst in cases of ICMEs. Cases of large tornado outbreaks (9%) that could not be associated with any specific solar wind disturbances, mostly because of solar wind data gaps, are marked by a question mark.



**Table S1:** Large tornado outbreaks (\* recurrent). Tornado daily counts centered on 0 UT  $\pm$  12 h for the given dates are shown in parentheses.

| Type | Dates (UT) (# of tornadoes)      | Location/State        | Key date of HCS, CIR or ICME         |
|------|----------------------------------|-----------------------|--------------------------------------|
| ?    | 29-30 Apr 1963 (12, 22)          | Central               | HCS: Apr 28 (data gap)               |
| ?    | 23 Apr 1964 (26)                 | Great Plains          | HCS: Apr 23 (data gap)               |
| ?    | 6 May 1964 (34)                  | Midwest, Great Plains | HCS: May 5 (data gap)                |
| ?    | 12 Apr 1965 (47)                 | Midwest               | ? (data gap)                         |
| ?    | 9 May 1965 (37)                  | Northern Great Plains | HCS/CIRs: May 8? (data gap)          |
| B    | 25-26 May 1965 (34, 43)          | Great Plains          | HCS/CIR: May 27                      |
| B    | 24 May 1966 (24)                 | Midwest South         | HCS: May 27                          |
| B    | 15 Oct 1967 (22)                 | Midwest               | HCS: Oct 15                          |
| A    | 25 Jan 1967 (30)                 | Midwest               | CIR: Jan 25                          |
| B    | 14 Apr 1967 (20)                 | South                 | HCS/CIR: Apr 14                      |
| B    | 22 Apr 1967 (46)                 | Midwest               | HCS/CIR: April 23; HDP               |
| A    | 1-2 May 1967 (21, 16)            | Midwest, South        | CIR: Apr 30                          |
| D    | 10-12 Jun 1967 (14, 25, 22)      | Midwest, Southwest    | CIR: Jun 8                           |
| A    | 14-15 Jun 1967 (16, 25)          | Midwest               | CIR: Jun 13                          |
| C    | 20-23 Sep. 1967 (18, 59, 22, 20) | TX (TC Beulah)        | ICMEs: Sep. 19 and 20 (Dst: -111 nT) |
| B    | 25 Oct 1967 (21)                 | Midwest               | HCS: Oct 25; HDP                     |
| B    | 4 Apr 1968 (20)                  | Central Midwest       | HCS/CIR Apr 5; HDP                   |
| B    | 16-17 May 1968 (39, 7)           | Central Midwest       | HCS/CIR May 17; HDP                  |
| ?    | 12-13 Jun 1970 (21, 18)          | Great Plains          | ? (data gap)                         |
| A    | 31 May – 1 Jun 1971 (17, 20)     | Great Plains          | HCS/CIR: May 29                      |
| D    | 7-10 Jun 1971 (23, 14, 9, 20)    | Midwest               | HCS/CIR: Jun 1; HSS >600 km/s        |
| ?    | 18 Oct 1971 (23)                 | Great Plains          | ? (data gap)                         |
| ?    | 15 Dec 1971 (37)                 | Texas, Central        | ? (data gap)                         |
| A    | 22 Apr 1972 (21)                 | Central, Southeast    | CIR: Apr 21                          |
| B    | 23 May 1972 (23)                 | Great Plains          | HCS/CIR: May 23; HDP                 |
| D    | 20-22 Apr 1973 (34, 22, 12)      | South, Midwest        | CIR: Apr 16; HSS >700 km/s           |
| A*   | 7-8 May 1973 (18, 25)            | Midwest, Southeast    | CIR: May 6*                          |
| B    | 26-27 May 1973 (13, 34)          | Midwest, Central      | HCS/CIR: May 28; HDP                 |
| A    | 28-29 May 1973 (41, 23)          | Midwest, Southeast    | HCS/CIR: May 28                      |
| A*   | 3-5 Jun 1973 (18, 20, 24)        | Midwest               | CIR: Jun 2*; HSS >700 km/s           |
| B    | 17 Jun 1973 (27)                 | Midwest               | HCS/CIR: Jun 17; HDP                 |
| B    | 27 Jun 1973 (28)                 | Midwest               | HCS/CIR: Jun 28; HDP                 |
| A    | 25 Nov 1973 (22)                 | Central, Southeast    | HCS/CIR: Nov 24; HSS >700 km/s       |
| B    | 2 Apr 1974 (23)                  | Midwest to South      | HCS: Apr 3; HDP                      |
| A    | 4 Apr 1974 (143)                 | Midwest to South      | HCS/CIR: Apr 3                       |
| B    | 8-9 Jun 1974 (17, 36)            | South                 | HCS: Jun 9; HDP                      |
| A    | 21 Jun 1974 (34)                 | Midwest               | CIR: Jun 20                          |

|   |                                 |                              |                                       |
|---|---------------------------------|------------------------------|---------------------------------------|
| D | 11 Aug 1974 (25)                | Illinois                     | HCS/CIR: Aug 2; HSS >600 km/s decl.   |
| A | 11 Jan 1975 (32)                | South                        | CIR: Jan 10                           |
| B | 30 Apr – 1 May 1975 (18, 15)    | South                        | HCS/CIR: May 1; HDP                   |
| D | 7-8 May 1975 (13, 23)           | Central, South               | CIR: May 5; HSS >600 km/s             |
| B | 26 Jun 1975 (23)                | Midwest                      | HCS: Jun 27                           |
| D | 13 Mar 1976 (27)                | Midwest, Southeast           | CIR: Mar 8; HSS>600 km/s              |
| D | 21 Mar 1976 (51)                | Midwest, South               | HCS/CIR: Mar15/ 16; HSS>600 km/s      |
| D | 30 Mar 1976 (20)                | South                        | HCS/CIR: Mar 26; HSS~600 km/s decl.   |
| D | 16 Apr 1976 (24)                | Great Plains, Texas          | CIR: Apr 13; HSS>600 km/s declining   |
| B | 20 Apr 1976 (20)                | Texas                        | HCS/CIR: Apr 22                       |
| A | 26-27 May 1976 (12, 20)         | Texas                        | HCS/CIR: May 25                       |
| A | 5 Jun 1976 (21)                 | Great Plains                 | HCS/CIR: Jun 3                        |
| A | 12-14 Jun 1976 (33, 12, 16)     | Midwest                      | CIR: Jun 10                           |
| A | 5-6 May 1977 (30, 14)           | Midwest, South               | CIR: May 4                            |
| D | 17-19 May 1977 (13, 13, 25)     | Midwest, Great Plains        | CIR: May 14, 22; HSS ~600 km/s decl.  |
| B | 21 May 1977 (28)                | Great Plains                 | HCS: May 21; HDP                      |
| B | 1 Jul 1977 (29)                 | Midwest                      | HCS/CIR: Jul 1; HDP                   |
| ? | 7 Aug 1977 (20)                 | Midwest                      | HCS/CIR: Aug 3/4? (data gap)          |
| A | 18-20 Apr 1978 (18, 13, 9)      | Southeast                    | HCS/CIR: Apr 17/18                    |
| A | 12-13 May 1978 (25, 26)         | Great Plains, Midwest, South | HCS/CIR May 11                        |
| A | 11-12 Apr 1979 (29, 31)         | South, Southeast             | HCS/CIR: Apr 9/10                     |
| B | 4 May 1979 (26)                 | TX, Southeast                | HCS/CIR: May 5; HDP                   |
| B | 20 Jun 1979 (24)                | Midwest                      | HCS/CIR: 22; HDP                      |
| D | 29 Jun 1979 (38)                | Midwest                      | CIR: Jun 26; HSS>400 km/s declining   |
| C | 8-9 Apr 1980 (33, 27)           | Great Plains, Central        | ICMEs: Apr 6/9 (Dst -33/-56 nT)       |
| A | 30 May 1980 (40)                | Midwest, Great Plains        | HCS/CIR: May 29                       |
| A | 5-6 Jun 1980 (34, 17)           | Midwest                      | HCS/CIR: Jun 4                        |
| A | 8 Jun 1980 (23)                 | Midwest                      | HCS/CIR: Jun 7                        |
| A | 10-11 Aug 1980 (8, 22)          | TX, Midwest                  | CIR: Aug 9                            |
| C | 18 May 1981 (20)                | Great Plains                 | ICME: May 17 (Dst -117 nT)            |
| ? | 23-24 May 1981 (15, 28)         | Great Plains                 | ?ICME: May 23 (Dst -60 nT) (data gap) |
| B | 14-16 Jun 1981 (29, 7, 8)       | Midwest                      | HCS/CIR: Jun 14/15; HDP               |
| B | 21-22 Jun 1981 (12, 35)         | Midwest                      | HCS: Jun 22; HDP                      |
| B | 16 Mar 1982 (24)                | Great Plains                 | HCS/CIR: Mar 18; HDP                  |
| C | 2-3 Apr 1982 (61)               | Great Plains, Midwest, South | ICME/CIR: Apr 1/3 (Dst -88 nT)        |
| C | 26-27 Apr 1982 (19, 8)          | South                        | ICME: Apr 24 (Dst -78 nT)             |
| D | 12-13 May 1982 (38, 32)         | Great Plains, South          | HCS/CIR: May 9; HSS declining         |
| A | 28-31 May 1982 (22, 14, 11, 17) | Great Plains                 | HCS/CIR: May 26; HSS >700 km/s        |
| C | 15 Jun 1982 (26)                | Great Plains, Midwest        | ICME: Jun 12 (Dst -58 nT)             |
| B | 2-3 Dec 1982 (9, 25)            | Mississippi River Basin      | HCS/CIR: Dec 3                        |
| B | 24-25 Dec 1982 (17, 26)         | Mississippi River Basin      | HCS: Dec 27                           |
| B | 2-3 May 1983 (33, 22)           | Great Lakes, MRB             | HCS: May 2                            |



|   |                                 |                                  |                                      |
|---|---------------------------------|----------------------------------|--------------------------------------|
| D | 13-14 May 1983 (8, 32)          | Great Plains                     | HCS/CIR: May 11; HSS >700 km/s       |
| B | 18-21 May 1983 (12, 21, 26, 19) | Great Plains, South              | HCS/CIR: May 20; HDP                 |
| C | 13-14 Jun 1983 (17, 28)         | Great Plains, MN                 | ICME: Jun 13 (Dst –110 nT)           |
| ? | 4 Jul 1983 (25)                 | Midwest                          | HCS: Jul 6 (data gap)                |
| A | 28-29 Mar 1984 (11, 24)         | Southeast                        | HCS/CIR: Mar 27/28                   |
| ? | 27 Apr 1984 (33)                | Great Plains                     | HCS/CIR/ICME?: Apr 24/25 (data gap)  |
| ? | 30 Apr 1984 (42)                | Great Plains, Midwest            | HCS/CIR: Apr 30? (data gap)          |
| ? | 3-4 May 1984 (25, 37)           | Southeast                        | CIR?: May 2 (Dst: -60 nT) (data gap) |
| ? | 8 May 1984 (22)                 | Central                          | HDP/CIR: May 9? (data gap)           |
| ? | 8-9 Jun 1984 (45, 13)           | Midwest                          | CIR? (data gap)                      |
| ? | 12 Jun 1984 (22)                | Great Plains                     | HSS? (data gap)                      |
| ? | 23 Jun 1984 (22)                | Midwest                          | HSS? (data gap)                      |
| B | 21-22 Apr 1985 (14, 23)         | Southwest                        | HCS: Apr 22; HDP                     |
| C | 29 Apr 1985 (21)                | Texas                            | ICME: Apr 26 (Dst –98 nT)            |
| B | 11-12 May 1985 (16, 24)         | Midwest                          | HCS/CIR: May 12; HDP                 |
| A | 30-31 May 1985 (17, 30)         | Midwest, Great Lakes             | HCS/CIR: May 31; HDP                 |
| B | 17-18 Aug 1985 (31, 10)         | Southeast                        | HCS/CIR: Aug 18; HDP                 |
| ? | 11–12 Mar 1986 (20, 13)         | Central, Southeast               | ?                                    |
| ? | 15-17 May 1986 (20, 25, 33)     | Great Plains, South, Central     | HCS/CIR: May 18/19; HDP (data gap)   |
| ? | 26-27 May 1987 (22, 14)         | TX, Great Plains                 | HCS/CIR: May 22/23? (data gap)       |
| B | 7-8 Jul 1987 (28, 16)           | Midwest, Great Plains            | HCS/CIR: Jul 8; HDP                  |
| D | 16-17 Nov 1987 (22, 28)         | South                            | CIR: Nov 10, 19; HSS > 600 km/s      |
| D | 9 May 1988 (57)                 | Midwest                          | CIR/ICME: May 5/6 (Dst –159 nT)      |
| ? | 17-18 Sep 1988 (24, 24)         | TX, TC Gilbert                   | HCS/CIR: Sep 17? (data gap)          |
| D | 16 Nov 1988 (44)                | Great Plains, MRB                | HCS/CIR: Nov 11/12; HSS ~600 km/s    |
| ? | 20 Nov 1988 (21)                | South                            | ? (data gap)                         |
| ? | 4-5 Apr 1989 (20, 19)           | Central, South                   | HSS>700 km/s (data gap)              |
| ? | 16-18 May 1989 (12, 20, 16)     | Texas                            | ? (data gap)                         |
| C | 25 May 1989 (33)                | Midwest                          | ICME: May 23 (Dst –84 nT)            |
| C | 7-9 Jun 1989 (19, 28, 23)       | South                            | ICMEs: Jun 6/8 (Dst –81–144 nT)      |
| ? | 16-17 Nov 1989 (18, 21)         | Southeast, East                  | HCS/HDP/ICME? (data gap)             |
| B | 10 Feb 1990 (20)                | South                            | HCS/HDP: Feb 12                      |
| C | 14-15 Mar 1990 (59, 11)         | Great Plains                     | ICME: Mar 12 (Dst –165 nT)           |
| ? | 28 Apr 1990 (29)                | Great Plains, South              | CIR: Apr 28; HCS: May 1 (data gap)   |
| ? | 25 May 1990 (24)                | Northern Great Plains            | ICMEs: May 21/25 (data gap)          |
| D | 2-3 Jun 1990 (21, 68)           | South, Central                   | CIR: May 30; HSS ~600 km/s           |
| A | 7-9 Jun 1990 (16, 23, 21)       | Great Plains                     | CIR/HCS: Jun 6                       |
| D | 17 Jun 1990 (28)                | Midwest                          | ICME/CIR: Jun 12/14; HSS>700 km/s    |
| B | 22 Dec 1990 (23)                | South                            | HCS: Dec 22                          |
| A | 22-23 Mar 1991 (19,23)          | IA, OK, AR, TN                   | HCS/CIR: Mar 21                      |
| C | 27-28 Mar 1991 (24, 26)         | CA(!), Great Plains, Great Lakes | ICME: Mar 24 (Dst –300 nT)           |
| B | 10 Apr 1991 (25)                | Central, Northeast               | HCS/CIR: Apr 10/11; HDP              |

|   |                                         |                              |                                        |
|---|-----------------------------------------|------------------------------|----------------------------------------|
| A | 13 Apr 1991 (24)                        | Great Plains                 | HCS/CIR: Apr 10/11                     |
| A | 27 Apr 1991 (55)                        | Great Plains, Midwest, South | CIR: Apr 25                            |
| ? | 30 Apr 1991 (23)                        | Midwest                      | CIR: Apr 25 (data gap)                 |
| ? | 11-12 May 1991 (16, 22)                 | TX, North Great Plains       | HCS/CIR: May 7 (data gap)              |
| ? | 15-17 May 1991 (10, 32, 48)             | Great Plains                 | ICMEs: May 13/16 (Dst -75/-106 nT) gap |
| ? | 29-31 May 1991 (16, 21,19)              | Great Plains                 | HCS/CIR: May 22 (data gap)             |
| C | 6-7 Jun 1991 (19, 22)                   | South, Great Plains          | ICME: Jun 4 (Dst -222 nT)              |
| C | 12 May 1992 (33)                        | OK, TX                       | ICME: May 9 (Dst -289 nT)              |
| B | 16-17 May 1992 (24, 12)                 | Midwest                      | HCS/CIR: May 18/19; HDP                |
| A | 15-18 Jun 1992 (58, 65, 29, 21)         | TX, Great Plains, Midwest    | HCS/CIR: Jun 15                        |
| B | 27-28 Jun 1992 (11, 23)                 | Great Plains, Southwest      | HCS: Jun 28; HDP                       |
| A | 13-16 Jul 1992 (39, 12, 8, 17)          | Great Lakes                  | HCS/CIR Jul 11/12                      |
| A | 27-29 Aug 1992 (39, 10, 13)             | South, East Coast            | HCS/CIR: Aug 26                        |
| A | 22-23 Nov 1992 (43, 52)                 | Southeast                    | HCS/CIR: Nov 22                        |
| A | 22 Feb 1993 (22)                        | Southeast                    | CIR: Feb 20                            |
| A | 6-10 May 1993 (16, 21, 46, 19, 16)      | Great Plains, South          | HCS/CIR: May 6; HSS >600 km/s          |
| B | 8-9 Jun 1993 (41, 57)                   | Midwest                      | HCS/CIR: Jun 10; HDP                   |
| B | 22-23 Jun 1993 (9, 24)                  | Midwest                      | HCS/CIR: Jun 23; HDP                   |
| A | 30 Jun – 4 Jul 1993 (16, 33, 17, 12,12) | Midwest                      | HCS/CIR: Jun 29                        |
| A | 8-10 Jul 1993 (15, 19, 17)              | Great Plains                 | HCS/CIR: Jul 8/9                       |
| A | 6-7 Aug 1993 (6, 22)                    | East Coast                   | HCS/CIR: Aug 4                         |
| ? | 14 Sep 1993 (22)                        | Southwest, Midwest           | CIR: Sep 13? (data gap)                |
| A | 28 Mar 1994 (28)                        | Southeast                    | CIR: Mar 27                            |
| B | 15-16 Apr 1994 (12, 24)                 | Central                      | HCS/CIR: Apr 16                        |
| A | 26-27 Apr 1994 (29, 67)                 | Great Plains, South, Central | CIR: Apr 25                            |
| B | 14 May 1994 (29)                        | TX                           | HCS/CIR: May 14; HDP                   |
| A | 30 May 1994 (23)                        | TX, LA                       | CIR: May 28                            |
| A | 26-28 Jun 1994 (11, 48, 14)             | Central Southeast            | HCS/CIR: Jun 25/26                     |
| ? | 28 Jul 1994 (25)                        | East                         | CIR: Jul 28? (data gap)                |
| D | 17 Aug 1994 (32)                        | Southeast                    | CIR: Aug 13; HSS >600 km/s declining   |
| B | 18-21 Apr 1995 (21)                     | OK                           | HCS: Apr 18; HDP                       |
| B | 20-21 Apr 1995 (38, 22)                 | South                        | HCS: Apr 21; HDP                       |
| D | 8-10 May 1995 (32, 19, 39)              | South, Midwest               | CIR: May 2; HSS >700 km/s declining    |
| C | 14 May 1995 (28)                        | Midwest, Central             | HCS/ICME: May 13 (Dst -13 nT)          |
| A | 17-19 May 1995 (25, 8, 77)              | Great Plains, Central South  | HCS/CIR: May 16                        |
| B | 23 May 1995 (21)                        | Great Plains                 | HCS/CIR: May 23; HDP                   |
| D | 28 May 1995 (29)                        | Midwest to East              | HCS/CIR: May 23; HSS >600 km/s         |
| B | 8-10 Jun 1995 (24, 29, 31)              | Great Plains                 | HCS/CIR: Jun 9; HDP                    |
| D | 28 Jul 1995 (27)                        | Great Plains                 | HCS/CIR: Jul 24; HSS >500 km/s         |
| A | 5-6 Oct 1995 (24, 9)                    | Southeast                    | HCS/CIR: Oct 4                         |
| A | 27-28 Oct 1995 (7, 22)                  | Southeast                    | HCS/CIR: Oct 26                        |
| D | 8 Nov 1995 (41)                         | Southeast                    | CIR: Nov 5; HSS >500 km/s declining    |

|   |                               |                       |                                      |
|---|-------------------------------|-----------------------|--------------------------------------|
| A | 19 Mar 1996 (21)              | MS, AL                | CIR: Mar 19                          |
| A | 12 Nov 1995 (25)              | Southeast             | CIR: Nov 11                          |
| D | 20-22 Apr 1996 (74, 7, 33)    | Midwest, Central      | CIR: Apr 17; HSS >700 km/s           |
| B | 9-10 May 1996 (21, 18)        | Midwest               | HCS/CIR: May 9; HDP                  |
| A | 24-26 May 1996 (9, 20, 20)    | Great Plains, South   | CIR: May 24                          |
| A | 31 May - 24 Jun 1996 (27, 24) | Central, Great Plains | CIR: May 29                          |
| ? | 18-19 Jul 1996 (11, 12, 20)   | Midwest, East         | HCS/CIR: Jul 17?                     |
| ? | 17 Sep 1996 (23)              | Southeast             | CIR: Sep 16?                         |
| B | 8 Oct 1996 (22)               | Southeast             | HCS/CIR: Oct 8; HDP                  |
| B | 27 Oct 1996 (26)              | Midwest               | HCS/CIR: Oct 27; HDP                 |
| B | 25 Jan 1997 (20)              | Southeast             | HCS: Jan 25; HDP                     |
| D | 1-2 Mar 1997 (15, 47)         | South Central         | CIR: Feb 26; HSS >600 km/s declining |
| A | 28 Mar 1997 (28)              | Central               | CIR: Mar 28                          |
| C | 11 Apr 1997 (20)              | TX                    | CIR/ICME: Apr 10 (Dst -82 nT)        |
| A | 24 Apr 1997 (24)              | FL                    | CIR: Apr 23                          |
| B | 1 May 1997 (30)               | Midwest               | HCS: Apr 30; CIR: May 1; HDP         |
| C | 26-28 May 1997 (53, 29, 22)   | Great Plains, South   | ICME: May 25 (Dst -74 nT)            |
| B | 12 Jun 1997 (22)              | Great Plains          | HCS: Jun 12; HDP                     |
| A | 17 Jun 1997 (24)              | TX, OK                | CIR: Jun 15                          |
| B | 2-4 Jul 1997 (19, 24, 10)     | Great Lakes           | HCS/CIR: Jul 3; HDP                  |
| A | 24 Oct 1997 (23)              | South                 | CIR: Oct 23                          |
| B | 9 Mar 1998 (23)               | Southeast             | HCS/CIR: Mar 10; HDP                 |
| A | 8-9 Apr 1998 (35, 15)         | Midwest, Southeast    | HCS/CIR: Apr 7/8                     |
| A | 16-17 Apr 1998 (23, 38)       | Central South         | HCS/CIR: Apr 16                      |
| A | 8-9 May 1998 (42, 10)         | Southeast             | CIR: May 7                           |
| A | 16 May 1998 (26)              | Midwest               | HCS/CIR: May 15                      |
| A | 25 May 1998 (28)              | Great Plains          | CIR: May 24                          |
| D | 31 May - 1 Jun 1998 (25, 39)  | Midwest, Northeast    | HCS/CIR: May 28/29; HSS >700 km/s    |
| B | 3 Jun 1998 (36)               | Northeast             | HCS/CIR: 3; HDP                      |
| D | 9-11 Jun 1998 (25, 8, 11)     | Great Plains, Midwest | CIR: Jun 5; HSS >600 km/s declining  |
| C | 14-15 Jun 1998 (45, 22)       | Southeast             | ICME: Jun 13                         |
| A | 19-20 Jun 1998 (23, 6)        | Midwest               | HCS/CIR: 18/19                       |
| B | 24 Jun 1998 (22)              | Midwest               | HCS: Jun 24; HDP                     |
| C | 27-28 Jun 1998 (11, 33)       | Midwest               | ICME: Jun 25 (Dst -101 nT)           |
| B | 30 Jun - 1 Jul 1998 (29, 11)  | Midwest, Northeast    | HCS/CIR: Jul 1; HDP                  |
| B | 29-30 Sep 1998 (25, 16)       | Southeast             | HCS: Sep 30; HDP                     |
| D | 5 Oct 1998 (28)               | Great Plains          | CIR/ICME: Oct 1/2; HSS >600 km/s     |
| ? | 2-3 Jan 1999 (34, 12)         | South                 | ?                                    |
| D | 18 Jan 1999 (22)              | Central               | HDP/CIR: Jan 18                      |
| A | 22-23 Jan 1999 (99, 30)       | South                 | CIR: Jan 20                          |
| A | 4-6 Apr 1999 (10, 8, 20)      | South, Great Plains   | CIR: Apr 4                           |
| B | 9 Apr 1999 (55)               | Midwest               | HCS/CIR: Apr 9/10; HDP               |

|   |                                    |                               |                                      |
|---|------------------------------------|-------------------------------|--------------------------------------|
| B | 4-6 May 1999 (75, 39, 18)          | Great Plains, Southeast       | HCS/CIR: May 5; HDP                  |
| B | 17 May 1999 (25)                   | Great Plains                  | CIR: May 18; HDP                     |
| B | 1-2 Jun 1999 (23, 30)              | Great Plains, Midwest         | HCS/CIR: Jun 1; HDP                  |
| D | 4-6 Jun 1999 (20, 44, 21)          | Midwest                       | CIR/ICME: Jun 2 (Dst -6 nT)          |
| B | 7 Jun 1999 (37)                    | Midwest                       | HCS/CIR: Jun 8; HDP                  |
| C | 27-30 Jun 1999 (11, 11, 4, 24)     | Great Plains                  | ICME: Jun 27 (Dst -41)               |
| A | 24 Apr 2000 (37)                   | South, Southeast              | CIR/ICME: Apr 23/24                  |
| C | 18-19 May 2000 (32, 37)            | Great Plains, Midwest         | ICME: May 16 (Dst -92 nT)            |
| C | 24-25 May 2000 (17, 22)            | Great Plains, Midwest         | ICMEs: May 23 (Dst -147 nT)          |
| A | 26-27 May 2000 (23, 10)            | Central                       | CIR: May 26                          |
| B | 17 Dec 2000 (24)                   | Southeast                     | HCS/CIR: Dec 17; HDP                 |
| B | 25 Feb 2001 (25)                   | South Central                 | HCS/CIR: Feb 27; HDP                 |
| C | 11 Apr 2001 (46)                   | Midwest                       | ICME: Apr 8 (Dst -59 nT)             |
| C | 12 Apr 2001 (33)                   | Midwest                       | ICME: Apr 11 (Dst -271 nT)           |
| B | 21-22 May 2001 (33, 26)            | Great Plains, Great Lakes, MI | HCS/CIR: May 22/23; HDP              |
| C | 28-30 May 2001 (12, 14, 29)        | Great Plains, Midwest         | ICME: May 27 (Dst -46 nT)            |
| B | 1-2 Jun 2001 (10, 25)              | Great Plains, Midwest         | HCS/CIR: Jun 2; HDP                  |
| D | 10-14 Jun 2001 (19, 4, 27, 36, 40) | Midwest                       | CIR: Jun 9; HSS >600 km/s declining  |
| D | 18-19 Jul 2001 (12, 26)            | Midwest                       | CIR: Jul 15; HSS >600 km/s declining |
| A | 10 Oct 2001 (30)                   | Great Plains                  | HCS/CIR: Oct 8                       |
| C | 12-14 Oct 2001 (9, 21, 28)         | South                         | ICME: Oct 11 (Dst -71 nT)            |
| C | 25 Oct 2001 (25)                   | Midwest                       | ICMEs: Oct 21/25 (Dst -187/-43 nT)   |
| A | 16 Nov 2001 (20)                   | TX                            | CIR: Nov 15                          |
| C | 24-25 Nov 2001 (23, 45)            | Southeast                     | ICME: Nov 24 (Dst -221 nT)           |
| A | 30 Mar 2002 (23)                   | TX                            | CIR: Mar 30                          |
| A | 28-29 Apr 2002 (24, 24)            | Central to East               | CIR: Apr 27                          |
| B | 5-6 May 2002 (12, 34)              | Great Plains                  | HCS/CIR: May 6; HDP                  |
| A | 8-9 May 2002 (20, 22)              | Great Plains, Midwest         | HCS/CIR: May 6                       |
| C | 4 Oct 2002 (25)                    | South                         | ICME: Oct 2 (Dst -146 nT)            |
| A | 10-11 Nov 2002 (11, 68)            | Central, Southeast            | HCS/CIR: Nov 10                      |
| B | 18-19 Dec 2002 (9, 33)             | Central to South              | HCS/CIR: Dec 19; HDP                 |
| A | 24-25 Dec 2002 (20, 12)            | South                         | CIR: Dec 22                          |
| B | 5-7 Apr 2003 (10, 7, 20)           | Midwest, South                | HCS/CIR: Apr 7/8; HDP                |
| A | 24-25 Apr 2003 (9, 30)             | South                         | CIR: Apr 24                          |
| A | 1-2 May 2003 (21, 13)              | Midwest                       | CIR: Apr 29                          |
| A | 5-9 May 2003 (86, 22, 75, 31, 41)  | Great Plains, Southeast       | HSS/HCS/CIR: May 4/5                 |
| C | 10-11 May 2003 (33, 60)            | Great Plains, Central         | ICME: May 9 (Dst -84 nT)             |
| D | 16-17 May 2003 (49, 40)            | Great Plains, South           | CIR: May 11; HSS >700 km/s declining |
| C | 31 May 2003 (21)                   | Midwest                       | ICMEs: May 29-30 (Dst -144 nT)       |
| D | 9-12 Jun 2003 (10, 21, 7, 22)      | Midwest                       | CIR: Jun 6; HSS >700 km/s declining  |
| B | 25 Jun 2003 (95)                   | Midwest                       | HCS/CIR: Jun 26; HDP                 |
| B | 10-11 Jul 2003 (21, 8)             | Midwest, Great Plains         | HCS/CIR: Jul 11; HDP                 |

|   |                                   |                                |                                       |
|---|-----------------------------------|--------------------------------|---------------------------------------|
| D | 20-22 Jul 2003 (8, 17, 23)        | Midwest, Northeast             | CIR: Jul 19; HSS >600 km/s declining  |
| D | 18-19 Nov 2003 (30, 9)            | TX, LA                         | CIR: Nov 15; HSS >700 km/s declining  |
| D | 5 Mar 2004 (25)                   | TX                             | HCS/CIR: Feb 26/27; HSS>700 km/s decl |
| A | 21-23 Apr 2004 (32, 5, 11)        | Midwest, Great Plains          | HCS/CIR: Apr 21                       |
| D | 22-25 May 2004 (24, 66, 9, 53)    | Midwest                        | HCS/CIR: May 20; HSS declining        |
| A | 28-31 May 2004 (26, 15, 81, 88)   | Midwest                        | HCS/CIR: May 28                       |
| B | 11-12 Jun 2004 (20, 38)           | Great Plains, Midwest          | HCS/CIR: Jun 12/13; HDP               |
| B | 24 Jun 2004 (24)                  | Midwest                        | HCS/CIR: Jun 25; HDP                  |
| B | 8 Jul 2004 (25)                   | KS                             | HCS/CIR: Jul 9; HDP                   |
| B | 13-15 Aug 2004 (21, 14, 14)       | Southeast                      | HCS/CIR: Aug 14; HDP                  |
| A | 6-9 Sep 2004 (28, 23, 43, 20)     | Midwest, Southeast, TC Frances | HCS/CIR: Sep 5                        |
| D | 16-18 Sep 2004 (34, 25, 59)       | Southeast, TC Ivan             | HCS/CIR/ICME: Sep 14; HSS >500 km/s   |
| A | 27-28 Sep 2004 (10, 25)           | Southeast                      | HCS/CIR: Sep 27                       |
| A | 19 Oct 2004 (36)                  | Central                        | HCS/CIR: Oct 18                       |
| A | 24-25 Nov 2004 (76, 22)           | South                          | HCS/CIR: Nov 23/24                    |
| D | 6-7 Apr 2005 (15, 23)             | South                          | CIR: Apr 4; HSS >600 km/s             |
| B | 11 Apr 2005 (21)                  | Great Plains                   | HCS/CIR: Apr 11; HDP                  |
| A | 4-8 Jun 2005 (13, 40, 15, 13, 16) | Great Plains, Midwest, TX      | HCS/CIR: Jun 4                        |
| B | 10-12 Jun 2005 (38, 13, 24)       | Great Plains, Midwest, TX      | HCS/CIR: Jun 12; HDP                  |
| B | 7-8 Jul 2005 (25, 22)             | South to East (TC Cindy)       | HCS/CIR: Jul 9; HDP                   |
| D | 19 Aug 2005 (28)                  | WI                             | CIR: Aug 15; HSS >700 km/s declining  |
| B | 30-31 Aug 2005 (40, 14)           | Southeast, East (TC Katrina)   | HCS/CIR: Aug 31; HDP                  |
| A | 25-26 Sep 2005 (60, 38)           | South (TC Rita)                | HCS/CIR: Sep 24/25                    |
| D | 16 Nov 2005 (49)                  | Central                        | HCS/CIR: Nov 11; HSS declining        |
| B | 28 Nov 2005 (67)                  | Great Plains                   | HCS/CIR: Nov 28/29; HDP               |
| D | 12-14 Mar 2006 (16, 57, 16)       | Central to Southeast           | HCS/CIR: Mar 9; HSS declining         |
| ? | 31 Mar 2006 (26)                  | Great Plains                   | ?CIR: Mar 27                          |
| B | 3 Apr 2006 (67)                   | Central                        | CIR: Apr 4; HDP                       |
| B | 7-8 Apr 2006 (12, 56)             | Great Plains to Southeast      | CIR: Apr 9; HDP                       |
| A | 14-17 Apr 2006 (18, 6, 14, 14)    | Midwest                        | HCS/CIR/ICME: Apr 13 (Dst -88 nT)     |
| B | 6 May 2006 (20)                   | TX                             | HCS/CIR: May 6 ; HDP                  |
| B | 22-23 Jun 2006 (14, 23)           | Great Plains, Midwest          | HCS: Jun 24; HDP                      |
| B | 22-23 Sep 2006 (15, 34)           | Great Plains to Central        | HCS/CIR: Sep 23; HDP                  |
| B | 27 Oct 2006 (31)                  | Great Plains                   | HCS/CIR: Oct 27/28; HDP               |
| B | 15-16 Nov 2006 (12, 22)           | South                          | HCS/CIR: Nov 15; HDP                  |
| A | 30 Dec 2006 (27)                  | TX                             | HCS/CIR: Dec 29                       |
| D | 1-2 Mar 2007 (13, 41)             | Southeast                      | HCS/CIR: Feb 26; HSS >600 km/s        |
| D | 29-31 Mar 2007 (59, 3, 14)        | TX, Great Plains               | CIR: Mar 27                           |
| B | 14-16 Apr 2007 (7, 21, 9)         | Southeast                      | HCS/CIR: Apr 17; HDP                  |
| B | 22 Apr 2007 (24)                  | TX, Great Plains               | HCS/CIR: Apr 22; HDP                  |
| A | 24-25 Apr 2007 (24, 24)           | Great Plains, South            | HCS/CIR: Apr 22                       |
| B | 5-7 May 2007 (32, 90, 14)         | Great Plains, Midwest          | HCS/CIR: May 7; HDP                   |



|    |                                 |                               |                                       |
|----|---------------------------------|-------------------------------|---------------------------------------|
| A  | 18-19 Oct 2007 (17, 45)         | Midwest to South              | CIR: Oct 18                           |
| D  | 8-9 Jan 2008 (47, 9)            | Midwest                       | HCS/CIR: Jan 4/5; HSS >600 km/s decl. |
| B  | 6 Feb 2008 (85)                 | Central, South                | HCS: Feb 8; HDP                       |
| D  | 18 Feb 2008 (23)                | Southeast                     | CIR: Feb 10; HSS>700 km/s declining   |
| D  | 16 Mar 2008 (46)                | Southeast                     | HCS/CIR: Mar 8; HSS >600 km/s decl.   |
| D  | 10-12 Apr 2008 (34, 20, 23)     | South, Midwest                | CIR: Apr 4; HSS >600 km/s declining   |
| A  | 24-26 Apr 2008 (20, 8, 9)       | TX                            | HCS/CIR: Apr 22/23; HSS >600 km/s     |
| A  | 2-3 May 2008 (29, 32)           | Great Plains, South           | HCS/CIR: Apr 30                       |
| B  | 11-12 May 2008 (59, 20)         | Southeast                     | CIR: May 13; HDP                      |
| B  | 15 May 2008 (20)                | South                         | CIR: May 16; HDP                      |
| D  | 23-26 May 2008 (27, 79, 23, 32) | Great Plains, Midwest         | HCS/CIR: May 19; HSS ~600 km/s decl.  |
| A  | 30-31 May 2008 (40, 16)         | Great Plains, Midwest         | HCS/CIR: May 28; HSS ~600 km/s        |
| B  | 5-8 Jun 2008 (40, 40, 10, 33)   | Great Plains, Midwest         | HCS/CIR: Jun 6; HDP                   |
| B  | 12-13 Jun 2008 (40, 26)         | Midwest                       | HCS/CIR: Jun 14; HDP                  |
| B  | 2-3 Sep 2008 (19, 21)           | South                         | CIR: Sep 3; HDP                       |
| B  | 13-14 Sep 2008 (13, 31)         | Great Plains, South           | HCS/CIR: Sep 14/15; HDP               |
| B  | 10 Dec 2008 (25)                | Southeast                     | HCS/CIR: Dec 11; HDP                  |
| A  | 8-9 Mar 2009 (8, 26)            | Midwest                       | CIR: Mar 8                            |
| A  | 24 Mar 2009 (20)                | Great Plains, South           | CIR: Mar 24                           |
| A* | 10-11 Apr 2009 (24, 63)         | South to Southeast            | HCS/CIR: Apr 8*                       |
| A  | 30 Apr 2009 (21)                | Great Plains                  | CIR: Apr 29                           |
| A  | 3-4 May 2009 (12, 23)           | Southeast                     | HCS/CIR: May 2                        |
| A* | 6-9 May 2009 (12, 18, 4, 47)    | Southeast, West North Central | HCS/CIR: May 5/6*                     |
| A  | 14 May 2009 (25)                | Great Plains                  | HCS/CIR: May 13                       |
| B  | 16-17 Jun 2009 (31, 22)         | Great Plains, Midwest         | HCS/CIR: Jun 17; HDP                  |
| A  | 20 Aug 2009 (30)                | Midwest                       | CIR: Aug 19                           |
| C  | 30 Oct 2009 (32)                | South                         | ICME: Oct 29 (Dst -41 nT)             |
| D* | 23-25 Apr 2010 (42, 13, 35)     | Great Plains to Southeast     | CIR/HCS: Apr 20/21*                   |
| B  | 1-2 May 2010 (26, 30)           | Midwest to Southeast          | CIR/HCS: May 2; HDP                   |
| A  | 11 May 2010 (69)                | Great Plains                  | HCS/CIR: May 10                       |
| A* | 19-20 May 2010 (31, 21)         | Great Plains                  | HCS/CIR: May 19*                      |
| B  | 25-26 May 2010 (22, 30)         | Midwest, Great Plains         | HCS/CIR: May 25/26; HDP               |
| B  | 6 Jun 2010 (46)                 | Great Lakes                   | HCS: Jun 6; HDP                       |
| D* | 18 Jun 2010 (74)                | Midwest                       | HCS/CIR: Jun 15*                      |
| A  | 22 Jun 2010 (27)                | Midwest, Great Plains         | CIR: Jun 21                           |
| A  | 26-27 Jun 2010 (22, 13)         | Midwest                       | HCS/CIR: Jun 25/26                    |
| D  | 25-28 Oct 2010 (19, 3, 60, 9)   | South, Midwest, Southeast     | CIR: Oct 22; HSS >600 km/s declining  |
| D  | 30 Nov 2010 (22)                | South                         | HCS/CIR: Nov 27                       |
| B  | 1 Jan 2011 (33)                 | Midwest to South              | HCS/CIR: Jan 2; HDP                   |
| B  | 28 Feb - 1 Mar (33, 12)         | Midwest, Southeast            | HCS/CIR: Jan 1; HDP                   |
| B  | 5 Apr 2011 (46)                 | Southeast                     | CIR/HCS: Apr 5; HDP                   |
| B  | 10-11 Apr 2011 (27, 20)         | Midwest                       | HCS/CIR: April 11; HDP                |

|    |                                    |                              |                                       |
|----|------------------------------------|------------------------------|---------------------------------------|
| B  | 15-17 Apr 2011 (56, 67, 55)        | Great Plains, Southeast      | HCS/CIR: Apr 17/18; HDP               |
| A  | 20 Apr 2011 (80)                   | East North Central           | CIR: Apr 20                           |
| D  | 26 Apr 2011 (50)                   | South                        | CIR: Apr 24; HSS declining            |
| B* | 27-28 Apr 2011 (110, 173)          | Southeast                    | HCS/CIR: Apr 28/29*; HDP              |
| A  | 22-24 May 2011 (18, 48, 17)        | Midwest, Great Plains        | CIR: May 21                           |
| B* | 25-26 May 2011 (49, 93)            | Midwest, Great Plains, South | HCS/CIR: May 26*; HDP                 |
| B* | 19-21 Jun 2011 (17, 10, 37)        | Great Plains, Midwest        | HCS/CIR: Jun 21*; HDP                 |
| C  | 23 Jan 2012 (23)                   | Central                      | ICME: Jan 22 (Dst -73 nT)             |
| C  | 26 Jan 2012 (22)                   | South                        | ICME: Jan 24 (Dst -80 nT)             |
| C  | 29 Feb 2012 (27)                   | Eastern                      | ICME: Feb 29 (Dst -12 nT)             |
| C  | 3 Mar 2012 (71)                    | Eastern                      | ICME: Mar 2 (Dst -32 nT)              |
| B  | 4 Apr 2012 (21)                    | South                        | HCS: Apr 5; HDP                       |
| D* | 14-16 Apr 2012 (14, 84, 14)        | Great Plains                 | CIR: Apr 12*; HSS ~600 km/s declining |
| B  | 1-2 May 2012 (23, 16)              | Great Plains, Midwest        | HCS: May 3; HDP                       |
| D* | 11 May 2012 (20)                   | TX                           | HCS/CIR: May 8*; HSS >600 km/s decl.  |
| B  | 2 Jun 2012 (26)                    | Mid Atlantic                 | HCS/CIR: Jun 3; HDP                   |
| A  | 25 Jun 2012 (22)                   | FL                           | HCS/CIR Jun 23/24                     |
| ?  | 26 Dec 2012 (30)                   | South                        | HCS: Dec 23; HSS declining            |
| B  | 30-31 Jan 2013 (60, 5)             | Central South                | HCS: Jan 31                           |
| A  | 16 May 2013 (20)                   | Southwest                    | CIR: May 15                           |
| B  | 20-21 May 2013 (27, 38)            | Midwest, Central, South      | HCS/CIR: May 22; HDP: May 15-22       |
| D  | 28-30 May 2013 (16, 25, 25)        | Great Plains, Midwest        | CIR/ICME (Dst -51 nT): May 24/25      |
| B  | 31 May - 1 Jun 2013 (30, 36)       | South, Midwest South         | HCS/CIR: May 22; HDP                  |
| D  | 13-14 Jun 2013 (21, 15)            | Midwest, East Central        | CIR: Jun 10; HSS declining            |
| B  | 1 Nov 2013 (33)                    | Central, South               | HCS/CIR: Nov 2; HDP                   |
| D  | 18 Nov 2013 (74)                   | Midwest, Central             | CIR: Nov 16; HSS declining            |
| C  | 21 Feb 2014 (35)                   | Central, South, East         | ICME: Feb 19, 20 (Dst -116, -91 nT)   |
| B  | 28-29 Apr 2014 (20, 57)            | Central, South               | HCS: Apr 30; HDP                      |
| A  | 12 May 2014 (36)                   | Great Plains                 | CIR: May 11                           |
| A  | 17-19 Jun 2014 (36, 19, 18)        | Midwest                      | HCS/CIR: Jun 16/17                    |
| A  | 1 Jul 2014 (42)                    | Midwest                      | CIR: Jun 30                           |
| A  | 13-14 Oct 2014 (7, 35)             | Central South                | CIR: Oct 13                           |
| B  | 20 Apr 2015 (22)                   | Southeast                    | HCS/CIR: Apr 20; HDP                  |
| B  | 25-27 Apr 2015 (27, 4, 20)         | Mid Atlantic, Great Plains   | HCS/CIR: Apr 27; HDP                  |
| C  | 7-11 May 2015 (47, 10, 11, 29, 25) | Great Plains, South          | ICMEs: May 6, 7, 10 (Dst -51 nT)      |
| B  | 17 May 2015 (59)                   | Great Plains, Midwest        | HCS: May 17; HDP                      |
| C  | 20 May 2015 (37)                   | South                        | ICME/CIR: May 18                      |
| B  | 24-26 May 2015 (26, 14, 34)        | South, Great Plains          | HCS/CIR: May 26; HDP                  |
| B  | 5 Jun 2015 (20)                    | Great Plains                 | HCS/CIR: 7/6; HDP                     |
| C  | 22-23 Jun 2015 (9, 24)             | Midwest, Great Lakes         | CIR/ICME: Jun 21/22 (Dst -204 nT)     |
| C  | 28 Jun 2015 (28)                   | Midwest                      | ICME: Jun 27 (Dst -56 nT)             |
| D  | 12 Nov 2015 (23)                   | IA                           | CIR: Nov 9; HSS ~700 km/s declining   |

|    |                              |                               |                                       |
|----|------------------------------|-------------------------------|---------------------------------------|
| B  | 17-18 Nov 2015 (43, 13)      | Great Plains, South           | HCS/CIR: Nov 17/18; HDP               |
| A  | 24 Dec 2015 (32)             | Central, South                | CIR: Dec 22; HSS                      |
| B  | 24-25 Feb 2016 (41, 23)      | South, Mid Atlantic           | HCS/CIR: Feb 25/26; HDP               |
| B  | 1 Apr 2016 (20)              | IN, South                     | HCS/CIR: Apr 2; HDP                   |
| D  | 27-28 Apr 2016 (43 23)       | Great Plains, Midwest         | CIR: Apr 23; HSS declining            |
| A  | 10-11 May 2016 (28, 12)      | Great Plains, Central         | HCS/CIR: May 8                        |
| D  | 23-25 May 2016 (25, 5, 45)   | Great Plains, Midwest         | CIR: May 21; HSS ~600 km/s declining  |
| A  | 23 Jun 2016 (23)             | Midwest                       | HCS/CIR: Jun 22                       |
| A  | 25 Aug 2016 (22)             | IN, OH, ON                    | CIR: Aug 23                           |
| D  | 30 Nov 2016 (29)             | Southeast                     | CIR: Nov 24; HSS>600 km/s declining   |
| B  | 3 Jan 2017 (36)              | South                         | HCS/CIR: Jan 3; HDP                   |
| D  | 22-23 Jan 2017 (61, 19)      | South                         | CIR: Jan 18; HSS ~600 km/s declining  |
| A  | 1-2 Mar 2017 (55, 14)        | Midwest, Central              | CIR: Mar 1                            |
| D  | 7 Mar 2017 (62)              | Midwest                       | CIR: Mar 1; HSS ~700 km/s declining   |
| D  | 29-30 Mar 2017 (20, 15)      | South                         | CIR: Mar 27; HSS >600 km/s declining  |
| B  | 3-4 Apr 2017 (25, 38)        | South, Southeast              | HCS: Apr 4; HDP                       |
| A  | 6 Apr 2017 (24)              | Southeast                     | ICME/CIR: Apr 4/5                     |
| B  | 30 Apr – 1 May 2017 (29, 32) | Central, Southeast, Northeast | HCS: May 1; HDP                       |
| A  | 5 May 2017 (22)              | Southeast                     | CIR: May 4                            |
| D  | 17 May 2017 (21)             | Great Plains                  | CIR: May 17; HSS>600 km/s declining   |
| A  | 19-20 May 2017 (58, 34)      | Great Plains                  | CIR: May 19                           |
| D  | 25 May 2017 (25)             | Midwest, Southeast            | CIR: May 19; HSS>600 km/s declining   |
| A  | 13 Jun 2017 (21)             | Midwest                       | HCS/CIR: Jun 11                       |
| D  | 29 Jun 2017 (26)             | Midwest                       | CIR: Jun 25; HSS declining            |
| B  | 6 Nov 2017 (24)              | Midwest                       | HCS/CIR Nov 7; HDP                    |
| D  | 25 Feb 2018 (30)             | Southeast                     | CIR: Feb 21; HSS>500 km/s declining   |
| D  | 20 Mar 2018 (20)             | Southeast                     | CIR: Mar 14; HSS ~600 km/s declining  |
| B  | 4 Apr 2018 (22)              | Eastern                       | CIR: Apr 4; HDP                       |
| D  | 14-16 Apr 2018 (40, 16, 18)  | South, Southeast              | HCS/CIR: Apr 8/9; HSS ~600 km/s decl. |
| B  | 3 May 2018 (33)              | Great Plains                  | HCS/CIR: May 4/5; HDP                 |
| A  | 29 May 2018 (29)             | Great Plains                  | CIR: May 27                           |
| A  | 20-21 Jul 2018 (23, 9)       | Midwest                       | CIR: Jul 19                           |
| D  | 29 Aug 2018 (26)             | Midwest                       | HCS/CIR: Aug 25/26; HSS ~600 km/s     |
| B  | 21 Sep 2018 (30)             | Midwest, Great lakes          | HCS/CIR: Sep 21; HDSP                 |
| B  | 2 Oct 2018 (21)              | Northeast                     | HCS/CIR: Oct 3                        |
| D* | 10 Oct 2018 (23)             | Great Plains, Midwest         | HCS/CIR: Oct 7*; HSS ~600 km/s decl.  |
| B  | 1 Nov 2018 (51)              | South                         | HCS: Nov 2; HDP                       |
| D* | 6 Nov 2018 (29)              | Central South                 | HCS/CIR: Nov 4*; HSS ~600 km/s decl.  |
| A* | 1-2 Dec 2018 (15, 34)        | Great Plains, Midwest, IL     | HCS/CIR: Dec 1*                       |
| D  | 4 Mar 2019 (44)              | Southeast                     | CIR: Feb 27; HSS ~600 km/s declining  |
| A  | 15 Mar 2019 (31)             | Midwest, South                | CIR: Mar 15                           |
| B  | 14-15 Apr 2019 (46, 28)      | South, Northeast              | CIR: Apr 15; HDP                      |

|   |                             |                                  |                                      |
|---|-----------------------------|----------------------------------|--------------------------------------|
| B | 19-20 Apr 2019 (45, 43)     | South, Southeast                 | HCS/CIR: Apr 19                      |
| B | 1 May 2019 (57)             | Great Plains                     | HDP/CIR: May 1                       |
| B | 8-9 May 2019 (23, 18)       | South                            | HDP/CIR: May 9                       |
| D | 18-19 May 2019 (27, 32)     | Great Plains, South              | CIR/ICME: May 13; HSS>500 km/s decl  |
| B | 21-23 May 2019 (52, 21, 36) | Great Plains, Midwest            | HCS: May 22; HDP                     |
| B | 26 May 2019 (28)            | Great Plains, Midwest            | HCS/CIR: May 26/27; HDP              |
| C | 27-28 May 2019 (34, 62)     | Great Plains, Midwest            | ICME: May 26 (Dst -16 nT)            |
| A | 30 May 2019 (41)            | TX, Midwest, East                | CIR: May 29                          |
| D | 16-17 Jun 2019 (29, 13)     | Great Plains, Midwest            | HCS/cir; Jun 12; HSS declining       |
| B | 21 Oct 2019 (33)            | Great Plains, South              | HCS/CIR: Oct 21; HDP                 |
| B | 17 Dec 2019 (36)            | South                            | HCS: Dec 18; HDP                     |
| D | 11-12 Jan 2020 (50, 30)     | Central South, Southeast         | CIR: Jan 8; HSS >500 km/s declining  |
| A | 6-7 Feb 2020 (19, 12)       | Central South, Southeast         | CIR: Feb 6                           |
| ? | 29 Mar 2020 (22)            | Midwest                          | CIR: Mar 30; HDP ?                   |
| A | 8-9 Apr 2020 (7, 25)        | Central North                    | CIR: Apr 8                           |
| A | 12-14 Apr 2020 (5, 113, 24) | Southeast                        | CIR: Apr 11                          |
| C | 20 Apr 2020 (19)            | South                            | ICME: Apr 20 (Dst -59 nT)            |
| D | 23-24 Apr 2020 (32, 17)     | South, Southeast                 | CIR: Apr 21; HSS~500 km/s declining  |
| D | 4-5 Aug 2020 (30, 13)       | Mid Atlantic                     | CIR: Aug 2                           |
| ? | 11 Aug 2020 (27)            | Midwest                          | ?                                    |
| B | 15 Aug 2020 (32)            | Midwest                          | HCS/CIR: Aug 16; HDP                 |
| A | 28-29 Aug 2020 (22, 6)      | SD, AR, Northeast                | HCS/CIR: Aug 25/26                   |
| A | 14 Mar 2021 (21)            | TX, Southwest                    | HCS/CIR: Mar 12/13                   |
| B | 18 Mar 2021 (40)            | Southeast                        | HCS/CIR: Mar 18/20; HDP              |
| A | 26 Mar 2021 (20)            | Southeast                        | CIR: Mar 24                          |
| A | 28 Mar 2021 (20)            | Southeast                        | CIR: Mar 27                          |
| A | 3-5 May 2021 (27, 52, 18)   | Great Plains, Southeast, Midwest | CIR: May 3                           |
| A | 27 May 2021 (21)            | Great Plains                     | HCS/CIR: May 26                      |
| A | 15 Jul 2021 (26)            | Midwest                          | CIR: Jul 14                          |
| A | 29-30 Jul 2021 (18, 29)     | Midwest, Northeast               | CIR: Jul 27                          |
| A | 9-10 Aug 2021 (10, 20)      | Midwest                          | HCS/CIR: Aug 9/10                    |
| A | 11 Oct 2021 (21)            | OK                               | CIR: Oct 10                          |
| C | 13 Oct 2021 (24)            | OK, KS                           | ICME: Oct 12 (Dst -64 nT)            |
| A | 11 Dec 2021 (68)            | Central                          | HCS/CIR: Dec 10                      |
| A | 16 Dec 2021 (125)           | Midwest                          | CIR: Dec 15                          |
| A | 6 Mar 2022 (22)             | Midwest                          | CIR: Mar 5                           |
| B | 22-23 Mar 2022 (37, 40)     | TX, South, Southeast             | HDP/CIR: Mar 21/22                   |
| C | 31 Mar 2022 (78)            | Southeast                        | ICME: Mar 31 (Dst -19 nT)            |
| D | 5 Apr 2022 (65)             | Southeast                        | CIR: Apr 2; HSS >500 km/s declining  |
| C | 13-14 Apr 2022 (28, 40)     | Midwest                          | ICMEs: Apr 12/14 (Dst -24/-81 nT)    |
| D | 30 Apr 2022 (21)            | Midwest, South, Southeast        | CIR: Apr 27; HSS >500 km/s declining |
| B | 13 May 2022 (32)            | Midwest                          | HCS/CIR: May 12/14                   |

|   |                         |                           |                                      |
|---|-------------------------|---------------------------|--------------------------------------|
| D | 31 May 2022 (31)        | Midwest                   | CIR: May 27; HSS >600 km/s declining |
| D | 5 Nov 2022 (30)         | South, Southeast          | CIR: Nov 2; HSS >600 km/s declining  |
| D | 30 Nov 2022 (23)        | Southeast                 | CIR: Nov 25; HSS >700 km/s           |
| D | 14-15 Dec 2022 (25, 18) | South, Southeast          | CIR: Dec 7; HSS >500 km/s declining  |
| B | 3-4 Jan 2023 (17, 29)   | Southeast                 | HCS/CIR: Jan 4                       |
| B | 13 Jan 2023 (41)        | Southeast                 | CIR: Jan13                           |
| D | 1 Apr 2023 (138)        | Midwest, Southeast        | CIR: Mar 30; HSS >600 km/s declining |
| B | 20 Apr 2023 (32)        | Great Plains, Midwest     | HCS: Apr 20                          |
| C | 11-12 May 2023 (9, 32)  | Northern Great Plains     | ICME: May 9 (Dst -18 nT)             |
| C | 13-14 May 2023 (34, 20) | Northern Great Plains     | ICME: May 12 (Dst -16 nT)            |
| A | 16 Jun 2023 (39)        | South, Southeast, Midwest | HCS/CIR: Jun 15                      |
| A | 22 Jun 2023 (45)        | Great Plains South        | CIR: Jun 21                          |
| A | 24 Jun 2023 (24)        | Northern Great Plains     | CIR: Jun 23                          |
| ? | 29 Jul 2023 (22)        | Midwest                   | ?CIR: Jul 30 (data gap)              |
| A | 7-8 Aug 2023 (10, 20)   | Northeast, Southeast      | CIR: Aug 7                           |
| A | 25 Aug 2023 (24)        | Midwest, Northeast        | CIR: Aug 24                          |
